# Supplementary material for: Transcriptome analysis of two contrasting rice cultivars during alkaline stress
Source: PubMed Central journal article supplement (PMC6018505; doi:10.1038/s41598-018-27940-x), 2018-06-25
Supplement: 41598_2018_27940_MOESM1_ESM.pdf [file 41598_2018_27940_MOESM1_ESM.pdf]

# Transcriptome analysis of two contrasting rice cultivars during alkaline stress

Ning Li\*, Hualong Liu\*, Jian Sun\*, Hongliang Zheng, Jingguo Wang, Luomiao Yang, Hongwei Zhao & Detang Zou

Rice Research Institute, College of Agriculture, Northeast Agricultural University, Harbin, China. Correspondence and requests for materials should be addressed to D.Z.  
(email: zoudtneau@126.com)

\* These authors have contributed equally to this work.

**Supplementary Table S1:** Quality evaluation of RNA-seq data.

| Sample name | Raw reads | Clean reads | clean bases | Error rate (%) | Q20 (%) | Q30 (%) | GC content (%) |
|-------------|-----------|-------------|-------------|----------------|---------|---------|----------------|
| CD_1        | 35106100  | 33222212    | 4.98G       | 0.01           | 97.79   | 94.45   | 54.88          |
| CD_2        | 39051184  | 37404194    | 5.61G       | 0.01           | 97.72   | 94.36   | 53.33          |
| CD_3        | 33963350  | 31829088    | 4.77G       | 0.01           | 97.38   | 93.57   | 55.46          |
| CDT_1       | 37439328  | 35443102    | 5.32G       | 0.01           | 97.94   | 94.65   | 56.03          |
| CDT_2       | 41797610  | 39746148    | 5.96G       | 0.01           | 97.91   | 94.62   | 57.64          |
| CDT_3       | 41255270  | 40215320    | 6.03G       | 0.02           | 97.10   | 92.54   | 55.14          |
| WD_1        | 27712092  | 26641752    | 4.00G       | 0.01           | 97.37   | 93.38   | 52.22          |
| WD_2        | 27073366  | 26419246    | 3.96G       | 0.02           | 96.56   | 91.43   | 52.39          |
| WD_3        | 36683258  | 33951874    | 5.09G       | 0.01           | 97.97   | 94.9    | 53.29          |
| WDT_1       | 41979130  | 40621516    | 6.09G       | 0.02           | 97.03   | 92.43   | 56.30          |
| WDT_2       | 48555630  | 46614884    | 6.99G       | 0.02           | 97.18   | 92.93   | 55.08          |

WDT\_3      41811332      40259070      6.04G      0.02      97.05      92.64      55.52

**Note:** CD-1, CD-2, CD-3 and CDT-1, CDT-2, CDT-3 represent three biological replicates of control samples and alkaline stress samples of Caidao, respectively; WD-1, WD-2, WD-3 and WDT-1, WDT-2, WDT-3 represent three biological replicates of control samples and alkaline stress samples of WD20342, respectively.

**Supplementary Table S2:** Summary of Illumina transcriptome reads mapped to the reference genome.

| Sample name      | CD_1                 | CD_2                 | CD_3                 | CDT_1                | CDT_2                | CDT_3                | WD_1                 | WD_2                 | WD_3                 | WDT_1                | WDT_2                | WDT_3                |
|------------------|----------------------|----------------------|----------------------|----------------------|----------------------|----------------------|----------------------|----------------------|----------------------|----------------------|----------------------|----------------------|
| Total reads      | 33222212             | 37404194             | 31829088             | 35443102             | 39746148             | 40215320             | 26641752             | 26419246             | 33951874             | 40621516             | 46614884             | 40259070             |
| Total mapped     | 28153042<br>(84.74%) | 31205848<br>(83.43%) | 25771632<br>(80.97%) | 31302069<br>(88.32%) | 33729487<br>(84.86%) | 34938158<br>(86.88%) | 22634771<br>(84.96%) | 20826635<br>(78.83%) | 27718761<br>(81.64%) | 33657600<br>(82.86%) | 39948998<br>(85.7%)  | 34475386<br>(85.63%) |
| Multiple mapped  | 408407<br>(1.23%)    | 429532<br>(1.15%)    | 473383<br>(1.49%)    | 410929<br>(1.16%)    | 354004<br>(0.89%)    | 408979<br>(1.02%)    | 345784<br>(1.3%)     | 308139<br>(1.17%)    | 427195<br>(1.26%)    | 463557<br>(1.14%)    | 515563<br>(1.11%)    | 401138<br>(1%)       |
| Uniquely mapped  | 27744635<br>(83.51%) | 30776316<br>(82.28%) | 25298249<br>(79.48%) | 30891140<br>(87.16%) | 33375483<br>(83.97%) | 34529179<br>(85.86%) | 22288987<br>(83.66%) | 20518496<br>(77.66%) | 27291566<br>(80.38%) | 33194043<br>(81.72%) | 39433435<br>(84.59%) | 34074248<br>(84.64%) |
| Reads map to '+' | 13875644<br>(41.77%) | 15384835<br>(41.13%) | 12657030<br>(39.77%) | 15440807<br>(43.57%) | 16687874<br>(41.99%) | 17268681<br>(42.94%) | 11140408<br>(41.82%) | 10251127<br>(38.8%)  | 13642233<br>(40.18%) | 16626928<br>(40.93%) | 19714016<br>(42.29%) | 17028827<br>(42.3%)  |
| Reads map to '-' | 13868991<br>(41.75%) | 15391481<br>(41.15%) | 12641219<br>(39.72%) | 15450333<br>(43.59%) | 16687609<br>(41.99%) | 17260498<br>(42.92%) | 11148579<br>(41.85%) | 10267369<br>(38.86%) | 13649333<br>(40.2%)  | 16567115<br>(40.78%) | 19719419<br>(42.3%)  | 17045421<br>(42.34%) |

|                  |                      |                      |                      |                      |                      |                      |                      |                      |                     |                      |                      |                      |
|------------------|----------------------|----------------------|----------------------|----------------------|----------------------|----------------------|----------------------|----------------------|---------------------|----------------------|----------------------|----------------------|
| Non-splice reads | 19536332<br>(58.81%) | 22381203<br>(59.84%) | 18845291<br>(59.21%) | 20091997<br>(56.69%) | 23211961<br>(58.4%)  | 23005958<br>(57.21%) | 15803790<br>(59.32%) | 15500230<br>(58.67%) | 19215669<br>(56.6%) | 23218409<br>(57.16%) | 26818297<br>(57.53%) | 23551291<br>(58.5%)  |
| Splice reads     | 8208303<br>(24.71%)  | 8395113<br>(22.44%)  | 6452958<br>(20.27%)  | 10799143<br>(30.47%) | 10163522<br>(25.57%) | 11523221<br>(28.65%) | 6485197<br>(24.34%)  | 5018266<br>(18.99%)  | 8075897<br>(23.79%) | 9975634<br>(24.56%)  | 12615138<br>(27.06%) | 10522957<br>(26.14%) |

**Note:** CD-1, CD-2, CD-3 and CDT-1, CDT-2, CDT-3 represent three biological replicates of control samples and alkaline stress samples of Caidao, respectively; WD-1, WD-2, WD-3 and WDT-1, WDT-2, WDT-3 represent three biological replicates of control samples and alkaline stress samples of WD20342, respectively.

**Supplementary Table S7:** Primer sequences of qRT-PCR.

| Primer Name           |   | Primer sequence 5'-3' | Annealing temperature( °C) | Product size (bp) |
|-----------------------|---|-----------------------|----------------------------|-------------------|
| <i>LOC_Os02g49160</i> | F | ACAAAGGTCTCGTCGCA     | 59                         | 122               |
|                       | R | CCCTCCTGGTCTTCGTAT    |                            |                   |
| <i>LOC_Os02g24700</i> | F | GTGCCGGTACGTGGTG      | 59                         | 119               |
|                       | R | GCAGGGAAGCGTGATG      |                            |                   |
| <i>LOC_Os06g04590</i> | F | GAGGAGTTCGGCTTCG      | 58                         | 129               |
|                       | R | CGGGTGCAGGAGTAGTG     |                            |                   |
| <i>LOC_Os12g40900</i> | F | GGAGACGCAGCAGAAGG     | 58                         | 116               |
|                       | R | CGGAGAAGCAGAGGAACA    |                            |                   |
| <i>LOC_Os03g64260</i> | F | AGGACCTGGGACCTGACT    | 59                         | 116               |
|                       | R | GGTGGCTTGGGCTTGTGC    |                            |                   |
| <i>LOC_Os08g07100</i> | F | GAAGACGATGAGCGAAAG    | 59                         | 134               |
|                       | R | GTAGGTGGCTGGTAACTGA   |                            |                   |
| <i>LOC_Os08g04500</i> | F | CTACTACCTGTGCCTACCTGC | 58                         | 138               |
|                       | R | TTCCTCGGAAACATGAGC    |                            |                   |
| <i>LOC_Os05g46460</i> | F | CTCGTCATCGGATTGGC     | 59                         | 108               |
|                       | R | GGATTTGTGCGGGAGC      |                            |                   |
| <i>LOC_Os08g30020</i> | F | TCGGTGTTCTTTTCAATGTC  | 59                         | 158               |
|                       | R | GCTTTGCTGCCTCCCTTT    |                            |                   |
| <i>LOC_Os12g26290</i> | F | CTCTTCAAGCCTCGTGTT    | 60                         | 128               |
|                       | R | GGTGTTCAAGTAGAGCAAA   |                            |                   |
| <i>Actin1</i>         | F | TGGCATCTCTCAGCACATTCC | 55                         | 150               |
|                       | R | TGCACAATGGATGGGTCAGA  |                            |                   |

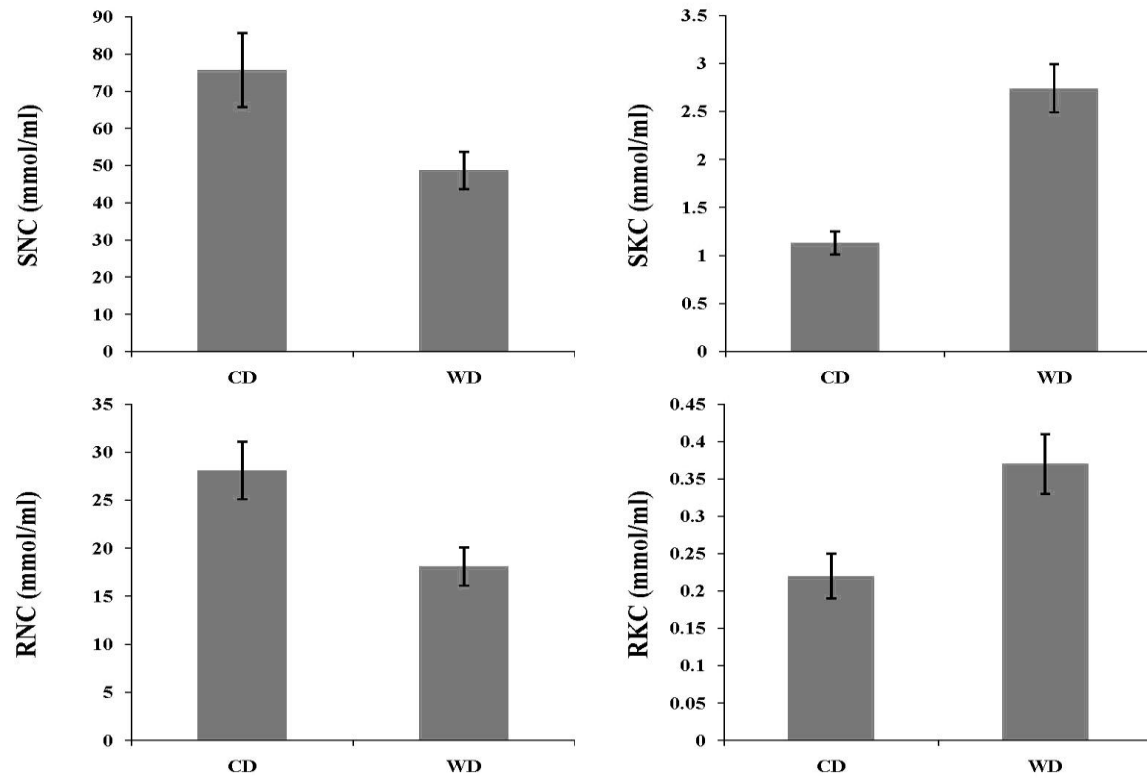

**Supplementary Figure S1. Performance of alkaline-tolerant related traits for Caidao and WD20342.** SNC and SKC mean that the concentration of Na<sup>+</sup> and K<sup>+</sup> in shoots, RNC and RKC mean that the concentration of Na<sup>+</sup> and K<sup>+</sup> in roots.

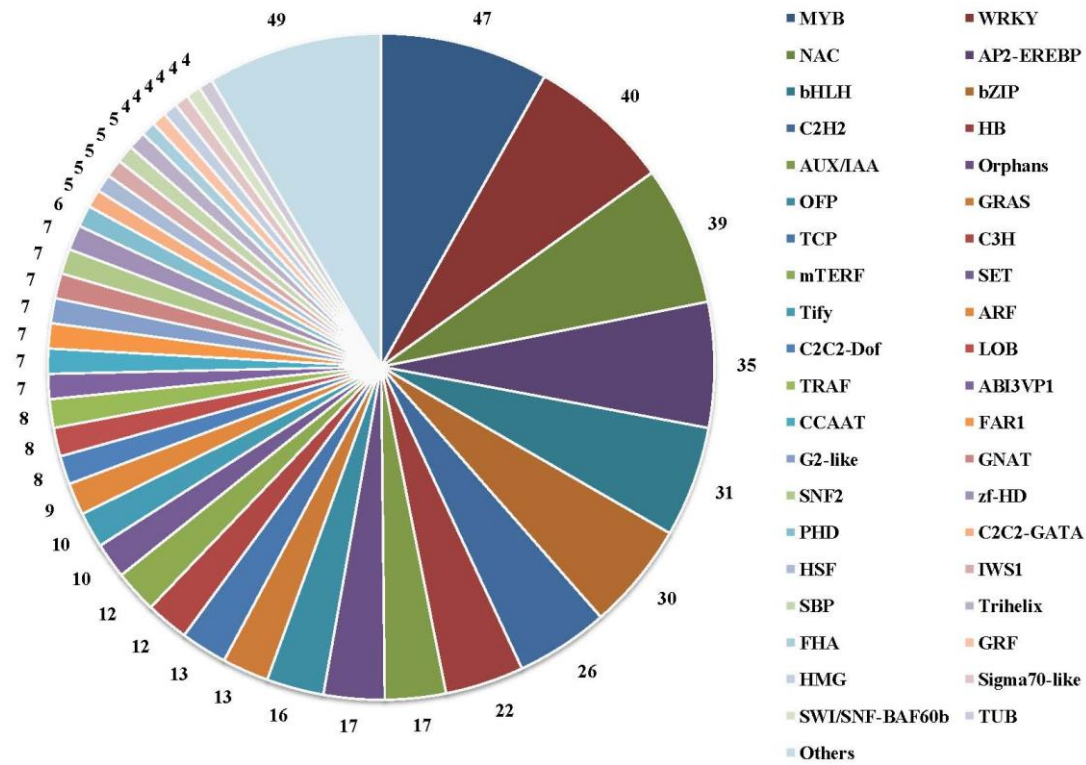

Supplementary Figure S2. Distribution of differentially expressed transcription factors in gene families.
